# Supplementary material
Source: PubMed Central journal article supplement (PMC11296898)
Supplement: NIHMS1984889-supplement-Supplemental_Figures.pdf [file NIHMS1984889-supplement-Supplemental_Figures.pdf]

# Supplemental Information

## EndoGenius: Optimized neuropeptide identification from mass spectrometry datasets

Lauren Fields,<sup>1</sup> Nhu Vu,<sup>1</sup> Tina Dang,<sup>3</sup> Hsu-Ching Yen,<sup>2</sup> Min Ma,<sup>3</sup> Wenxin Wu,<sup>1</sup> Lingjun Li<sup>1,3,4,5\*</sup>

<sup>1</sup>Department of Chemistry, University of Wisconsin-Madison, 1101 University Avenue, Madison, WI 53706, USA

<sup>2</sup>Department of Biochemistry, University of Wisconsin-Madison, 433 Babcock Drive, Madison, WI 53706, USA

<sup>3</sup>School of Pharmacy, University of Wisconsin-Madison, 777 Highland Avenue, Madison, WI 53705, USA

<sup>4</sup>Lachman Institute for Pharmaceutical Development, School of Pharmacy, University of Wisconsin-Madison, Madison, WI 53705, USA

<sup>5</sup>Wisconsin Center for NanoBioSystems, School of Pharmacy, University of Wisconsin-Madison, Madison, WI 53705, USA

\*Corresponding author

Tel.: +1 (608) 265-8491

Fax: +1 (608) 262-5345

E-mail: [lingun.li@wisc.edu](mailto:lingun.li@wisc.edu)

## Table of Contents

Supplemental Figures (located within this document)

- **Figure S1:** PSM assignment decision tree
- **Figure S2:** Evaluation of motif database perturbations
- **Figure S3:** Target-decoy entrapment search results
- **Figure S4:** DSD results
- **Figure S5:** FDR versus EndoGenius score evaluation

Supplemental files

- **Supplemental File 1:** Definitive screening design
- **Supplemental File 2:** Full-factorial design
- **Supplemental File 3:** Crustacean neuropeptide motif database
- **Supplemental File 4:** EndoGenius user manual

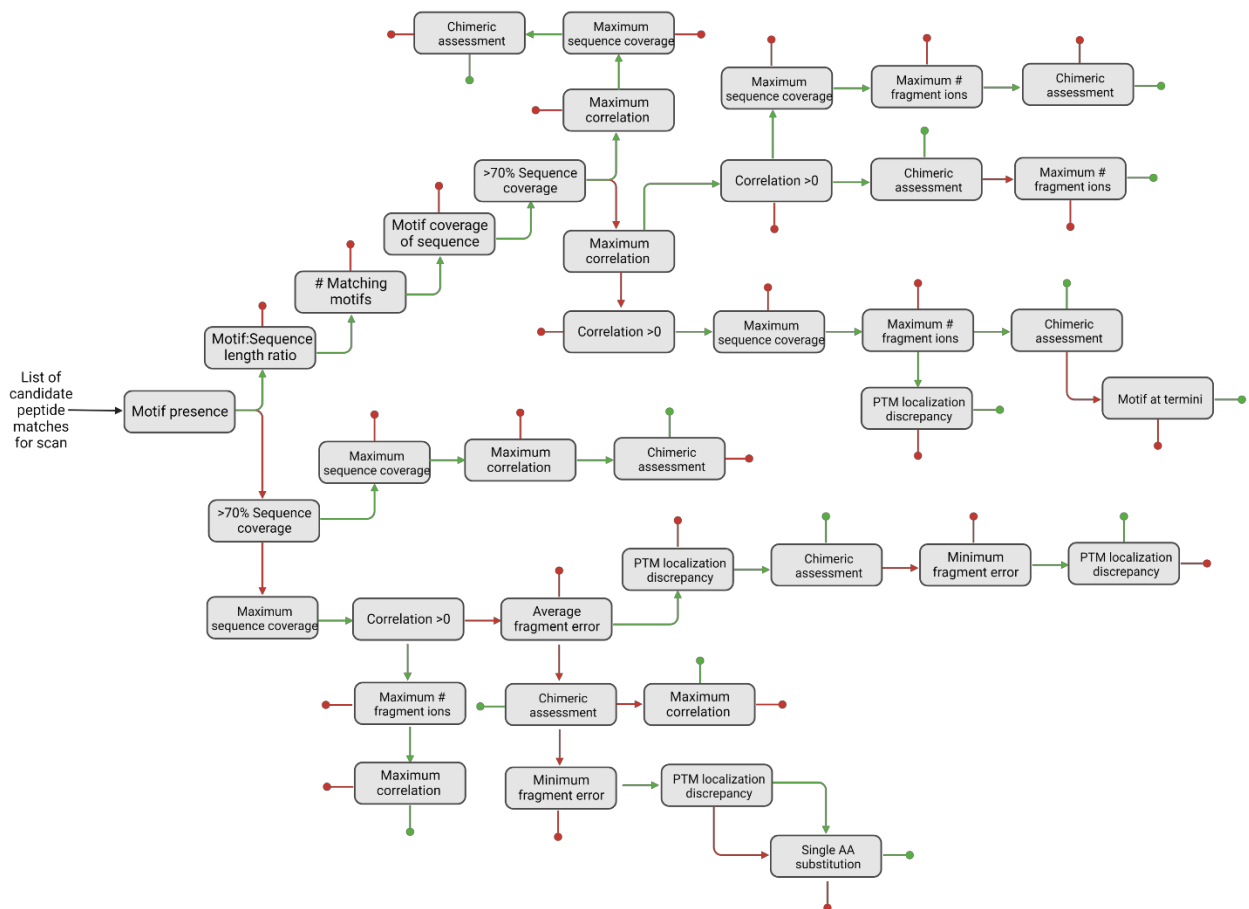

**Figure S1:** A specialized peptide-spectrum match (PSM) filtering decision-tree was developed to reward neuropeptide-typic attributes of a given PSM. At each step in the decision tree, if only one peptide match was remaining for a given spectrum, that peptide was assigned as the PSM. Otherwise, the next round of criteria was assessed. In this tree, green color denotes a positive response, wherein a candidate PSM satisfied the criterion, whereas a red color denotes a negative response, where the criterion was not satisfied. Nodes represent where no additional criteria were presented, and a peptide was selected at random from the remaining candidate PSMs, in line with more traditional PSM assignment approaches.

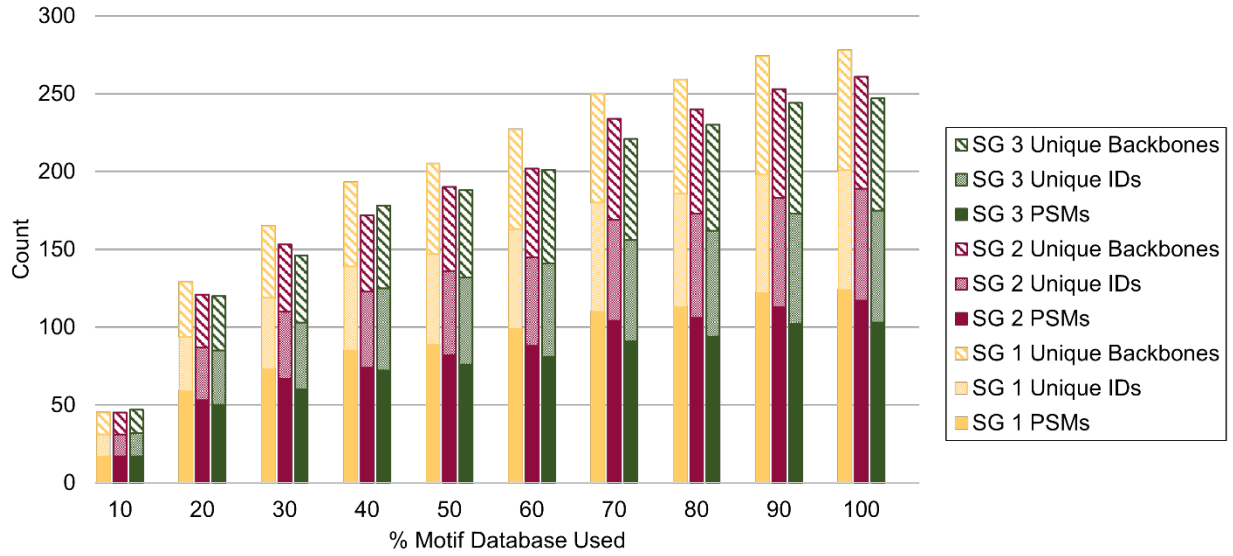

**Figure S2:** Evaluation of number of PSMs, unique IDs, and unique backbones across three technical replicates when a fraction of the motif database, selected at random, was included in the analysis. Unique IDs refers to a neuropeptide including any post-translational modifications (PTMs), while unique backbones refer to the amino acid sequence of the neuropeptide only.

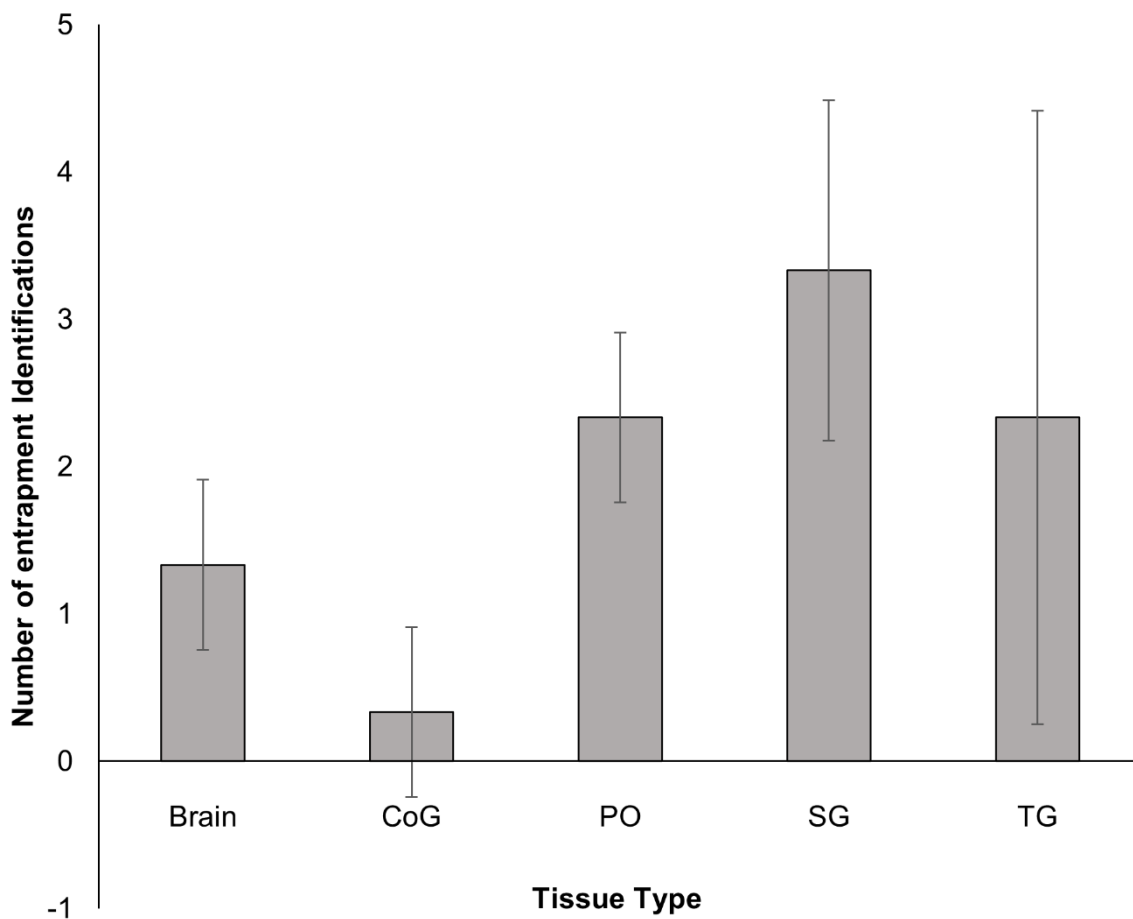

**Figure S3:** Average number of unique backbones yielded by EndoGenius searches of five tissue types across three technical replicates when searching against an entrapment database. Error bars representing mean  $\pm$  standard deviation.

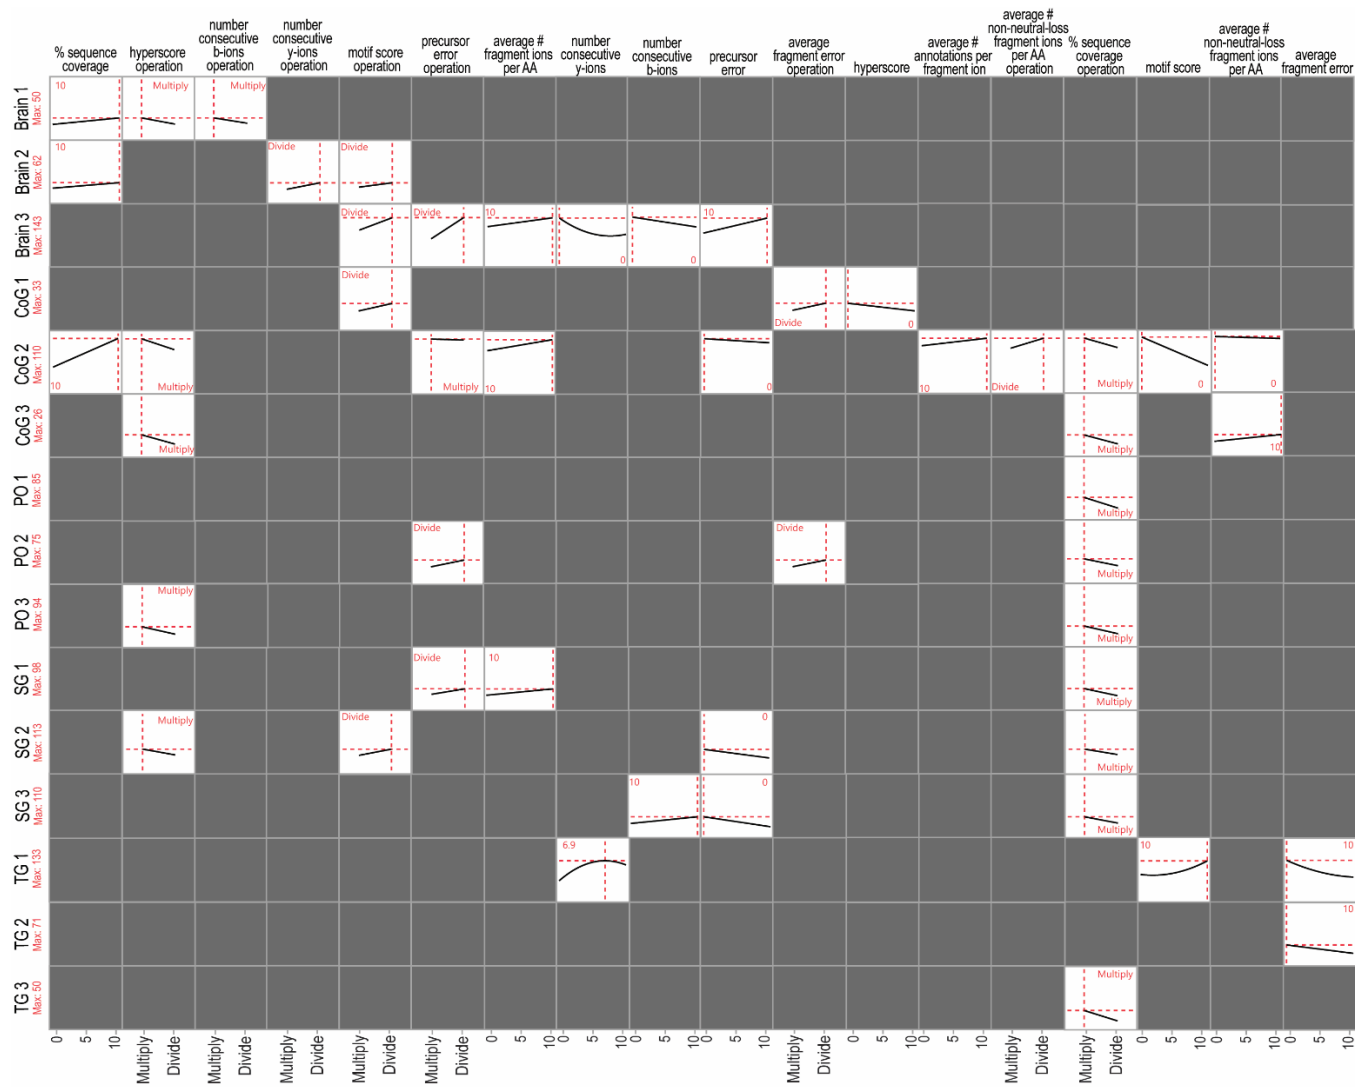

**Figure S4:** Results of definitive screening design when optimized for desirability, marked by the maximum number of unique identifications at 1% FDR, with responses from 15 samples. Results shown here are reported as significant factors.

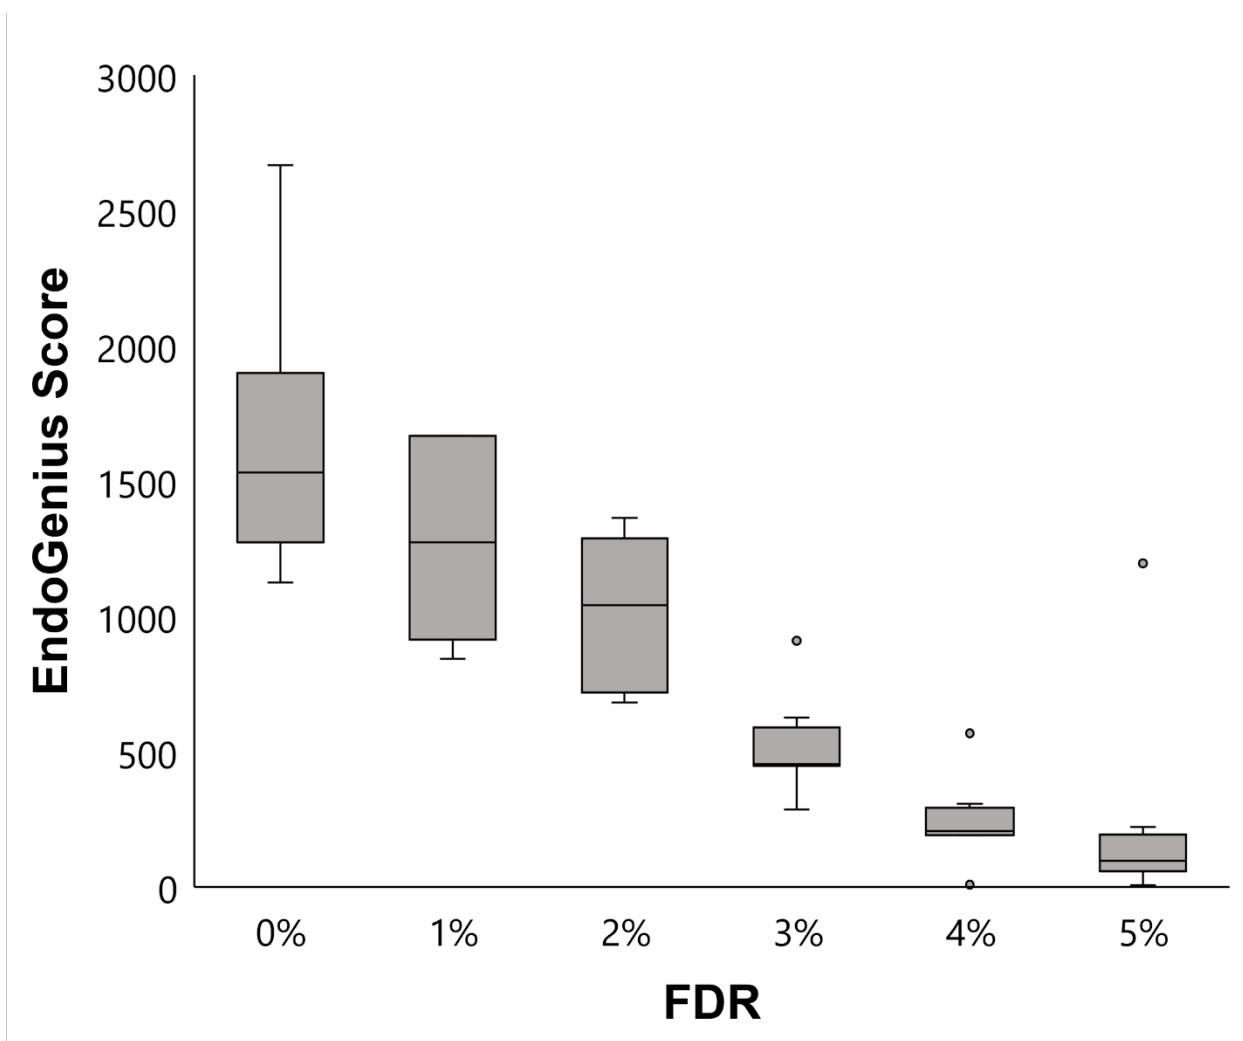

**Figure S5:** Correlation of false-discovery rate to the EndoGenius score, with results summarized from 15 spectral datasets.
